# Supplementary material for: Plasmid DNA Production in Proteome-Reduced Escherichia coli
Source: MDPI journal article supplement (doi:10.3390/microorganisms8091444), 2020-09-21
Supplement: s1 [file s1]

## Supplementary Material to:

### Plasmid DNA production in proteome-reduced *E. coli*

Mitzi de la Cruz, Elisa A. Ramírez, Juan-Carlos Sigala, José Utrilla, Alvaro R. Lara

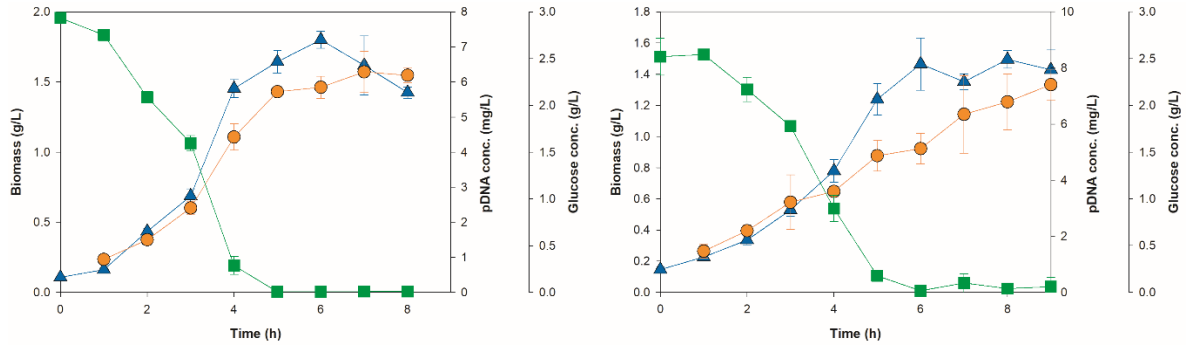

**Figure S1.** Time profiles of cultures of the wild type (left) and PFC (right) strains in mineral medium. Triangles: biomass; circles: plasmid DNA; and squares, glucose concentrations. Error bars show the standard deviation between triplicate experiments.

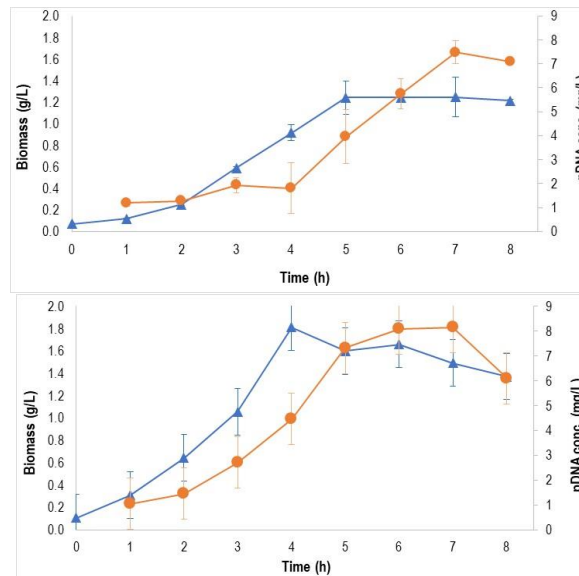

**Figure S2.** Time profiles of cultures of the wild type (left) and PFC (right) strains in Lysogeny Broth. Triangles: biomass; circles: plasmid DNA. Error bars show the standard deviation between triplicate experiments.

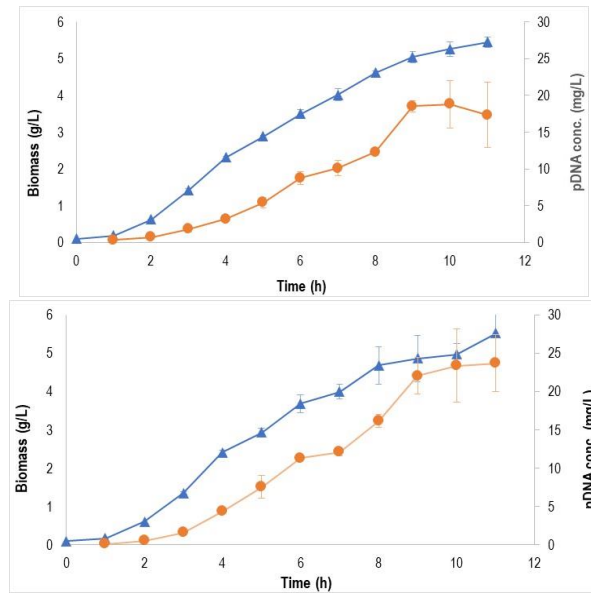

**Figure S3.** Time profiles of cultures of the wild type (left) and PFC (right) strains in Terrific Broth. Triangles: biomass; circles: plasmid DNA. Error bars show the standard deviation between triplicate experiments.

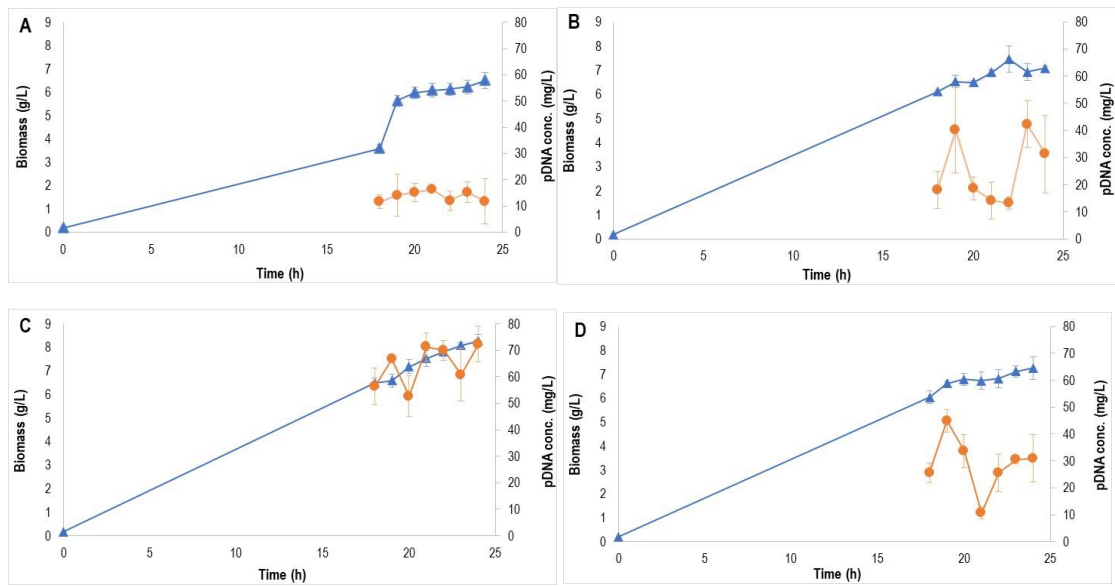

**Figure S4.** Time profiles of cultures of the wild type (A), wild type  $\Delta recA$  (B), PFC (C) and PFC  $\Delta recA$  (D) strains in Espresso B Plasmid medium. Triangles: biomass; circles: plasmid DNA. Error bars show the standard deviation between triplicate experiments.

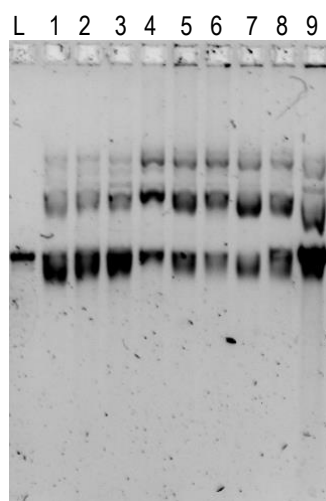

**Figure S5.** Example of agarose gel used for densitometric analysis of the pDNA produced by the proteome-reduced strain. L: pUC57Kan digested with *Bam*HI; 1-3: pDNA samples from triplicate cultures in LB; 4-6: pDNA samples from triplicate cultures in mineral medium; 7-9: pDNA samples from triplicate cultures in EnPresso B Plasmid medium.
